# Supplementary material
Source: publisher figshare collection journal article supplement (https://karger.figshare.com/articles/dataset/_/5128438)

rs11851414 (Meta  $P = 1.44 \times 10^{-7}$ )

Gene : *ZFP36L1*

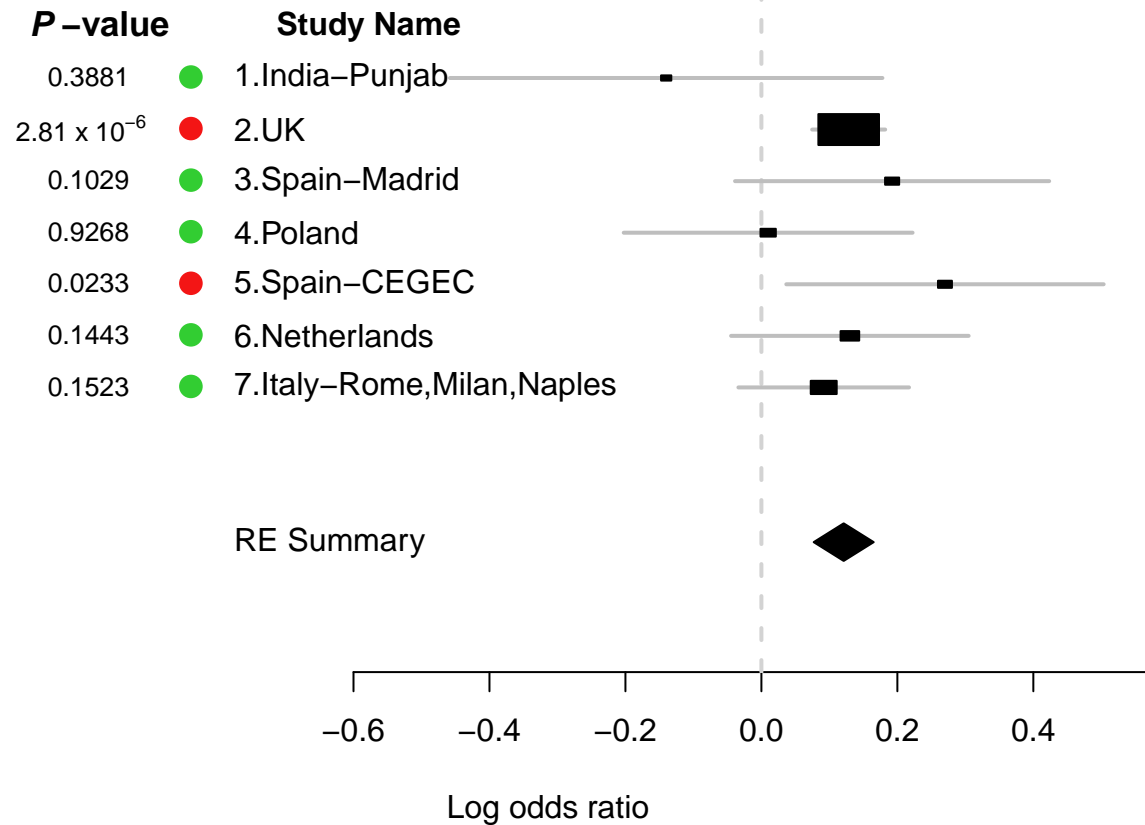

PM-Plot

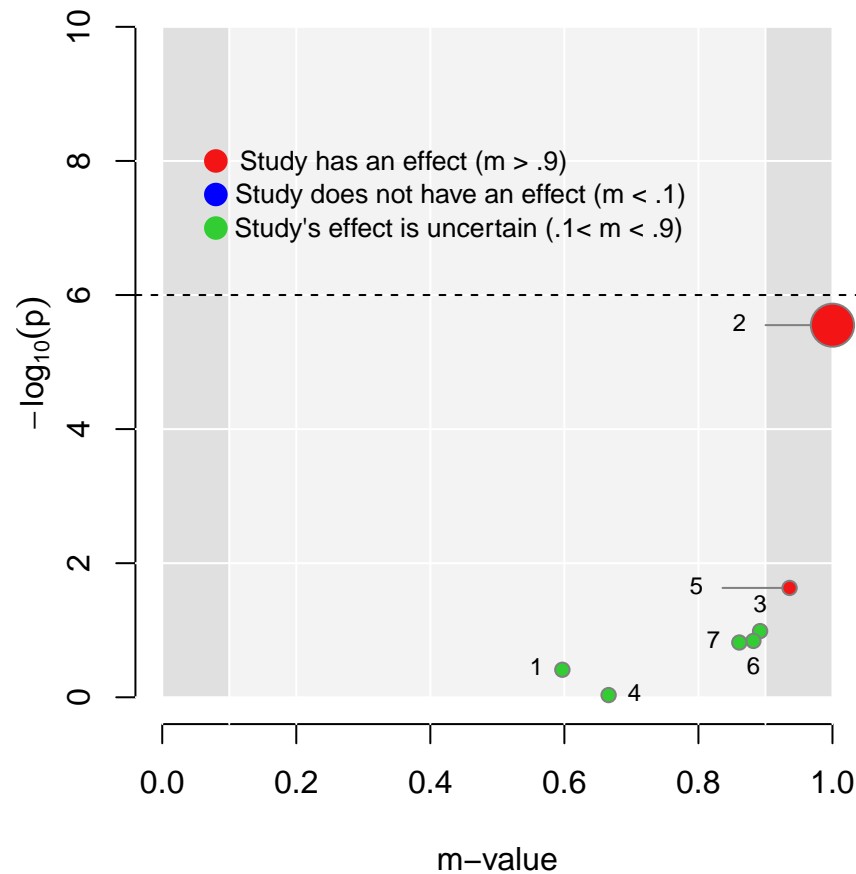

Supplement: Supplementary file 1 [file 1]

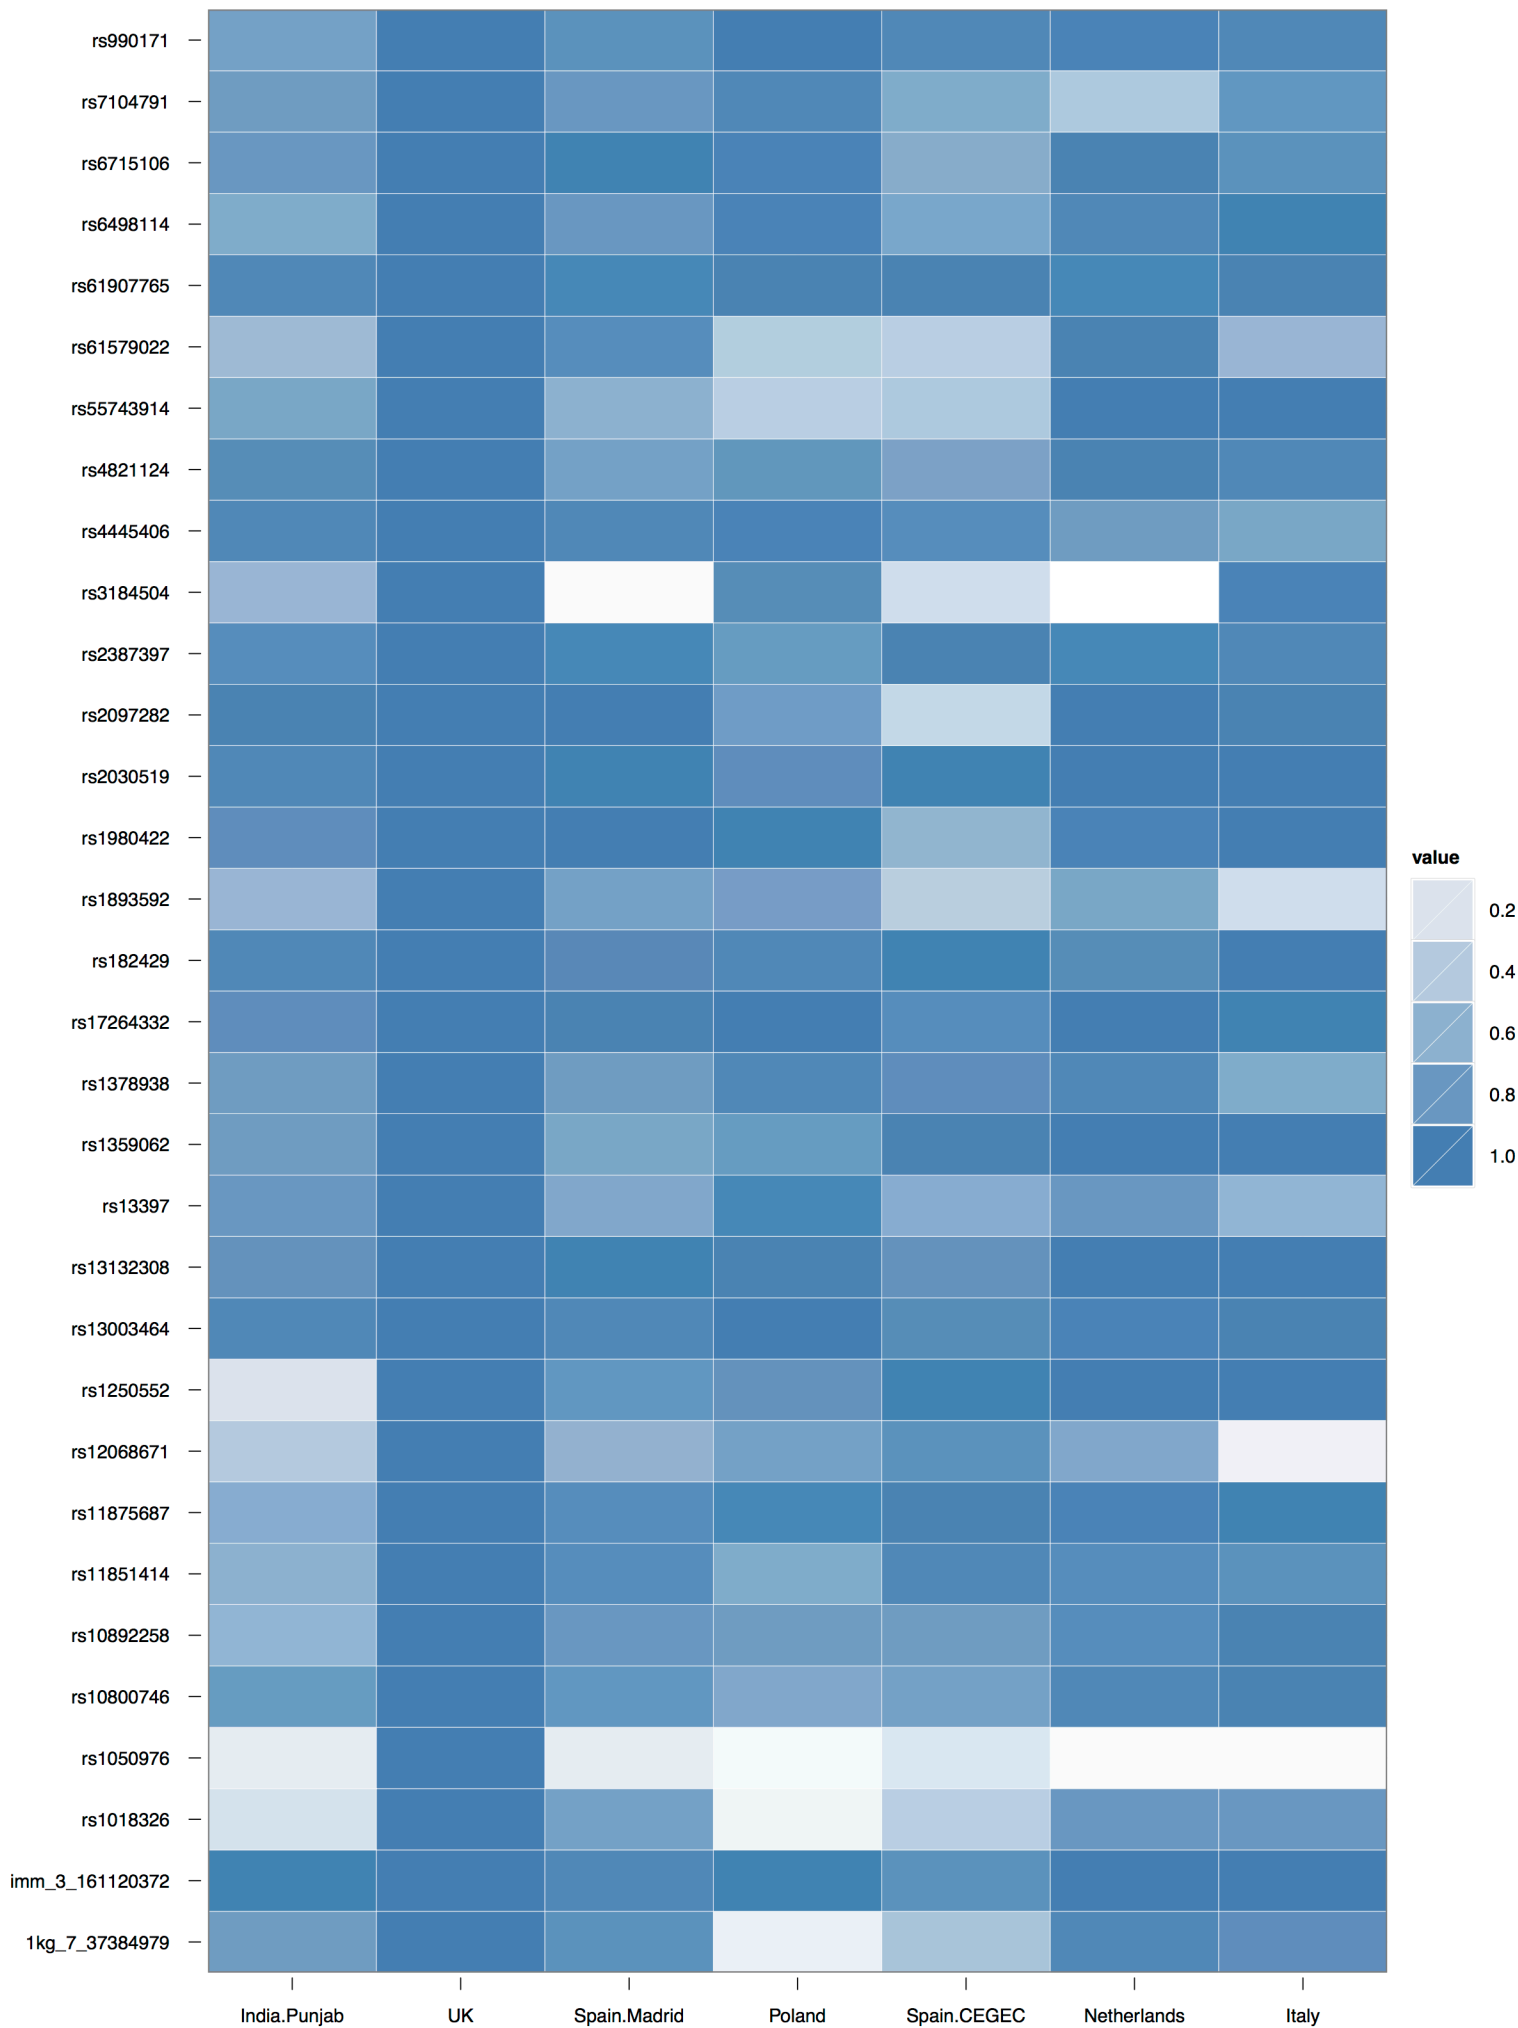

Supplement: Supplementary file 2 [file 1]
